# Supplementary material for: A nomogram for predicting breast cancer specific survival in elderly patients with breast cancer: a SEER population-based analysis
Source: Springer Nature journal article supplement (doi:10.1186/s12877-023-04280-8), 2023-09-25
Supplement: MOESM1 [file 26085278]

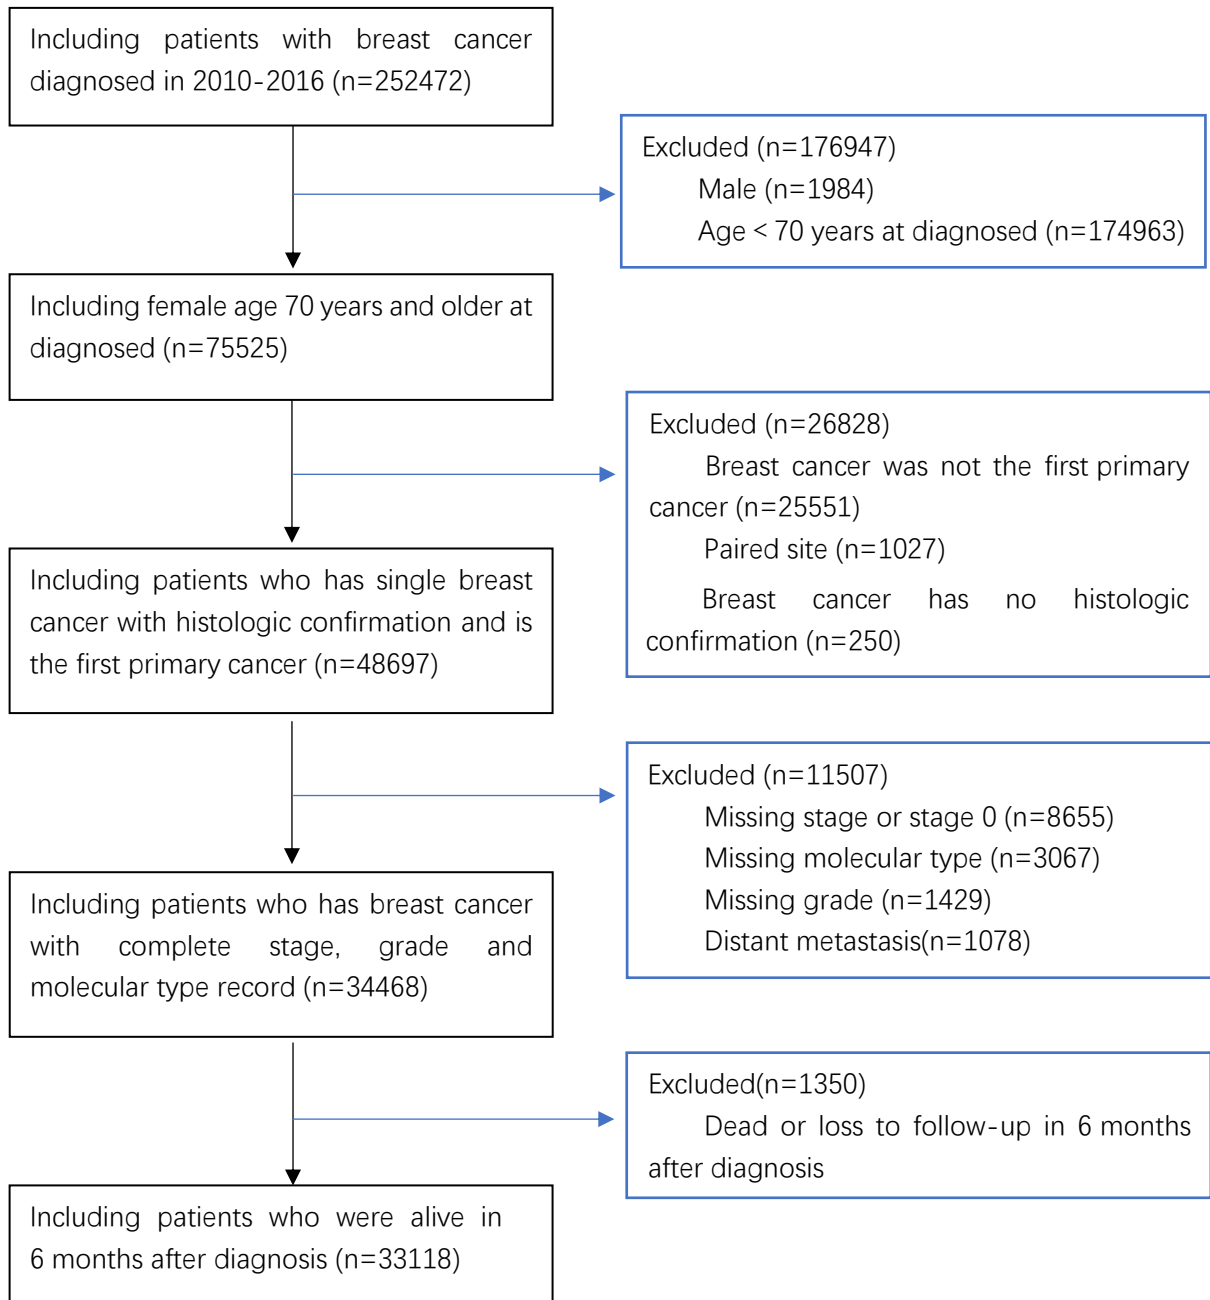

### Supplementary 1 Patients Selection

Patients with breast cancer data including treatment record were included from January 1, 2010 to December 31, 2016. 252,472 patients diagnosed breast cancer in the database during this time period were identified. Finally, 33,188 eligible patients were included.
